# Supplementary material for: Thermal stability of processed PVC/bamboo blends: effect of compounding procedures
Source: Springer Nature journal article supplement (doi:10.1007/s00107-016-1148-5), 2017-01-20
Supplement: MOESM1 [file 12011268]

**Supplementary Materials**

Table 1 (in List of Tables) records the content and function of all raw materials (includes additives). The stabilizer Mark CZ2000 contains the phenol free calcium and zinc powder to reduce odor emission, function as HCl acid scavenger and weathering resistivity for rigid PVC. Processing aid Paraloid K120 was a readily dispersible acrylic powder that can improve the rigid PVC operation by shortening the fusion time and providing more homogeneous melt for easy processing. Furthermore, internal lubricant Loxiol G60 contains the solid/neutral dicarboxylic acid ester and is suitable for excellent internal free-mixing of polymer chains during initial mixing. It is basically judged by noting the extension of melt viscosity reduction (Grossman 2008). As suggested by Thacker (2008), more external lubricants should be used especially in double screw extrusion in order to control amperage at maximum rpm. In this relation, three types of external lubricants have been used in this study. External lubricant Loxiol G21 comprised of fatty acid, affecting the relatively longer gelation time, lower friction, and higher resistance within melts. Moreover, external lubricant Ligalub GT, which contains glycerol ester, was added to improve the external flow-characterizations of the mass. The combinations of these fatty acid and ester in the formulation offer good clarity and mixing compatibility in PVC composite processing (Thacker, 2008). Meanwhile, the presence of PE wax in external lubricant Licocene PE4201 leads to the torque and processing energy reduction, and improvement of composite’s surface properties. The main purpose of PE wax is to prevent sticking and melt fracture in counter-rotating double screw extrusion and simultaneously provide good surface finish and glossy features to the extruded product (Thacker 2008).

1. **DSC assessment of additives used**

(b)

(a)

Figure A1: DSC thermograms of all additives: (a) first heating cycle, (b) second heating cycle

Table A1: DSC assessment of all additives (second heating cycle)

| Additives | Temperature (°C) | | | |
| --- | --- | --- | --- | --- |
| Peak 1 | Tg | Peak 2 | Melting range |
| Mark CZ2000 | 17.0 | 69.0 | - | - |
| Paraloid K120 | - | 101.0 | - | - |
| Loxiol G60 | 44.0 | - | - | - |
| Loxiol G21 | 44.4 | - | - | 73.0 |
| Ligalub GT | 47.9 | - | - | - |
| Licocene PE4201 | 44.0 | - | - | 123.0 |

1. **TGA measurement of additives used**

(a)

(b)

Figure B1: TGA thermograms of all additives used: (a) weight loss, (b) derivative weight

Table B1: TGA measurement of all additives

| Additives | T-5%  (°C) | Peak T (°C) | | |
| --- | --- | --- | --- | --- |
| Peak 1 | Peak 2 | Peak 3 |
| Mark CZ2000 | 205.0 | 260.0 | 442.5 | - |
| Paraloid K120 | 254.5 | 260.0 | 367.5 | 390.0 |
| Loxiol G60 | 288.0 | 372.5 | - | - |
| Loxiol G21 | 222.5 | 277.5 | 340.0 | - |
| Ligalub GT | 319.0 | 392.5 | - | - |
| Licocene PE4201 | 294.5 | 452.5 | - | - |

1. **Performance of CMB**

Table C1: Mechanical performance of CMB using C1 (Bahari and Krause 2016)

| Composite group | MOE (N/mm2) | MOR (N/mm2) |
| --- | --- | --- |
| 75µm, 25% | 3821 (193) | 57 (4) |
| 75µm, 50% | 5115 (136) | 47 (4) |
| 1 mm, 25% | 4086 (186) | 53 (7) |
| 1 mm, 50% | 5146 (204) | 40 (4) |
| Pure PVC | 2866 (44) | 73 (3) |

Note: MOE = modulus of elasticity

MOR = modulus of rupture

Standard deviation in parentheses

Grossman RF (2008) Lubricants and related additives. In Grossman RF (ed) Handbook of vinyl formulating.John Wiley and Sons Inc., USA

Thacker GA (2008) Formulating rigid pvc for extrusion. In Grossman RF (ed) Handbook of vinyl formulating. John Wiley and Sons Inc., USA
